# Supplementary material for: A novel bisoxazoline/Pd composite microsphere: a highly active catalyst for Heck reactions
Source: Royal Society of Chemistry journal article supplement (doi:10.1039/c5ra16510e), 2015-01-01

## **A novel bisoxazoline/Pd composite microsphere: a highly active catalyst for the Heck reactions**

Junke Wang,<sup>a</sup> Yingxiao Zong,<sup>a,b</sup> Guoren Yue,<sup>b</sup> Yulai Hu<sup>\*b</sup> and Xicun Wang<sup>\*b</sup>

---

<sup>a</sup>Key Laboratory of Hexi corridor resources utilization of Gansu Universities, College of Chemistry and Chemical Engineering, Hexi University, Zhangye 734000, China

<sup>b</sup>Gansu Key Laboratory of Polymer Materials, College of Chemistry and Chemical Engineering, Northwest Normal University, Lanzhou 730070, China

### **Table of Contents**

|                                                                    |          |
|--------------------------------------------------------------------|----------|
| <b>1. Materials and methods .....</b>                              | <b>2</b> |
| <b>2. Optimization of the catalytic conditions .....</b>           | <b>3</b> |
| <b>3. Preparation and analytical data of catalyst C .....</b>      | <b>4</b> |
| <b>4. General Experimental Procedures for Heck Couplings. ....</b> | <b>5</b> |
| <b>5. NMR spectra of the materials and products.....</b>           | <b>8</b> |

## 1. Materials and methods

Melting points were determined on a Perkin-Elmer differential scanning calorimeter and were uncorrected. The IR spectra were run on a Nicolette spectrometer (KBr). NMR spectra were recorded at 400 ( $^1\text{H}$ ) and 100 ( $^{13}\text{C}$ ) MHz, respectively, on a Varian Mercury plus-400 instrument using  $\text{CDCl}_3$  as solvent and TMS as the internal standard. Scanning electron microscopy (SEM) was performed on a FEI Quanta 450 FEG FESEM instrument. High resolution mass spectra (HRMS) were obtained on an Agilent LC-MSD-Trap-XCT spectrometer with micromass MS software using electrospray ionisation (ESI). All the solvents used were strictly dried according to standard operation and stored on 4 Å molecular sieves.

All other chemicals (AR grade) were commercially available and used without further purification.

## 2. Optimization of the catalytic conditions

**Table 1** The effect of solvents and bases<sup>a</sup>

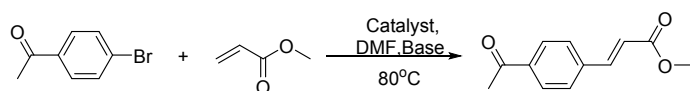

| Entry | Catalyst (Pd mol%) | Base                     | Time (h) | Yield(%) <sup>b</sup> |
|-------|--------------------|--------------------------|----------|-----------------------|
| 1     | 0.05               | $\text{Na}_2\text{CO}_3$ | 2        | 56                    |
| 2     | 0.05               | $\text{K}_2\text{CO}_3$  | 2        | 72                    |
| 3     | 0.05               | KOAc                     | 2        | 40                    |
| 4     | 0.05               | NaOAc                    | 2        | 30                    |
| 5     | 0.05               | TEA                      | 2        | 21                    |
| 6     | 0.05               | Pyridine                 | 2        | 14                    |
| 7     | 0                  | $\text{K}_2\text{CO}_3$  | 2        | 0                     |
| 8     | 0.075              | $\text{K}_2\text{CO}_3$  | 2        | 80                    |
| 9     | 0.10               | $\text{K}_2\text{CO}_3$  | 2        | 90                    |
| 10    | 0.15               | $\text{K}_2\text{CO}_3$  | 2        | 90                    |
| 11    | 0.10               | $\text{K}_2\text{CO}_3$  | 3        | 94                    |
| 12    | 0.10               | $\text{K}_2\text{CO}_3$  | 4        | 98                    |
| 13    | 0.10               | $\text{K}_2\text{CO}_3$  | 5        | 98                    |

<sup>a</sup>Reaction conditions: bisoxazoline/Pd microsphere, 1 mmol of p-bromoacetophenone, 1 mmol of methyl acrylate, 2 mmol of base, 5 ml of solvent, 80 °C in air.

<sup>b</sup> Isolated yield.

### 3. Preparation and analytical data of catalyst C

#### Synthesis of bisacylthiourea B

To a solution of 4,4'-Oxybisbenzoyl chloride **A** (2 mmol) in CH<sub>2</sub>Cl<sub>2</sub> (10 mL) was added ammonium thiocyanate (2.6 mmol) and PEG-400 (0.2 mmol). The mixture was then stirred at room temperature for 60 min and cooled to 0°C, and the solution of 2-aminoethanol (1.8 mmol) in CH<sub>2</sub>Cl<sub>2</sub> (2 mL) was added. The mixture was continuously stirred for 60 min. After the completion of the reaction, the solvent was removed by distillation, and water (10 mL) was added to obtain a white solid. The analytical sample was produced by flash chromatography (acetone and petroleum ether) to give a white solid **B**. Yield: 85%. Melting point: 209-211°C. Spectral data: IR (KBr) (cm<sup>-1</sup>):  $\nu$  3337, 3225, 2944, 1670, 1531. <sup>1</sup>H NMR (400 MHz, DMSO)  $\delta$  11.35 (s, 2H), 11.05 (s, 2H), 8.02 (d,  $J$  = 8.8 Hz, 4H), 7.17 (d,  $J$  = 8.8 Hz, 4H), 4.98 (s, 2H), 3.83-3.44 (m, 8H). <sup>13</sup>C NMR (100 MHz, DMSO)  $\delta$  180.71, 167.65, 159.87, 131.68, 128.22, 118.95, 58.75, 47.97, 40.38, 40.17, 39.96, 39.75, 39.54. HR-MS:  $m/z$  calcd for C<sub>20</sub>H<sub>21</sub>N<sub>2</sub>O<sub>5</sub>S<sub>2</sub> [M+H]<sup>+</sup>: 433.0892; found: 433.0889.

#### Synthesis of bisoxazoline C

To a solution of compound **B** (1 mmol) in DMF (5 mL) was added dicyclohexylcarbodiimide (DCC) (1 mmol) and TEA (1 mmol). The mixture was stirred for 2 h at 80°C, and cooled to room temperature. After the addition of water (5 mL), the white solid was obtained by the filtration. This solid was added into CH<sub>3</sub>CN (5 mL) to be dissolved, followed by the filtration and concentration to afford the target compound **C**. Yield: 98%. Melting point: 195-196°C. Spectral data: IR (KBr) (cm<sup>-1</sup>):  $\nu$  3310, 2921, 1638, 1548. <sup>1</sup>H NMR (400 MHz, DMSO)  $\delta$  9.61 (s, 2H), 8.28 – 7.99 (m, 4H), 7.20 – 6.98 (m, 4H), 4.47 (t,  $J$  = 8.6 Hz, 4H), 3.78 (t,  $J$  = 8.6 Hz, 4H). <sup>13</sup>C NMR (100 MHz, DMSO)  $\delta$  180.71, 167.65, 159.87, 131.68, 128.22, 118.95, 58.75, 47.97, 40.59, 40.38, 40.17, 39.96, 39.75, 39.54, 39.33. HR-MS:  $m/z$  calcd for C<sub>20</sub>H<sub>19</sub>N<sub>4</sub>O<sub>5</sub> [M+H]<sup>+</sup>: 395.1355; found: 395.1395.

#### Synthesis of catalyst D

To the solution of Pd(AcO)<sub>2</sub> (2 mmol) in CH<sub>3</sub>CN (5 mL) was added dropwise into the obtained compound **C** (1.36 g, 6 mmol) in CH<sub>3</sub>CN (2 mL), followed by the stirring for 10 h. On completion, the filtration was conducted to a yellow solid. Washing with commercial anhydrous CH<sub>3</sub>CN (3 × 5 mL) and drying at 50 °C overnight gave bisoxazoline/Pd microsphere as a pale yellow powder (compound **D**). IR (KBr) (cm<sup>-1</sup>):  $\nu$  3443, 2907, 1592. The Pd content of the bisoxazoline/Pd microsphere catalyst is 20.01 wt% (1.8 mmol/g) measured by atomic absorption spectroscopy (AAS).

### 4. General Experimental Procedures for Suzuki-Miyaura Couplings

In a typical experiment, the bisoxazoline/Pd microsphere catalyst (0.10 mmol of Pd) was added to a mixture of aryl halide (1.0 mmol), olefins (1.2 mmol), and K<sub>2</sub>CO<sub>3</sub> (1.0 mmol) in DMF (5.0 mL), and the reaction mixture was stirred at 80°C. After the reaction was monitored to be complete by TLC analysis, the catalyst was removed by filtration, washed with ethanol (3 × 3 mL), and dried under vacuum for the next run. The organic fractions were then concentrated on a rotary evaporator to afford the desired compound in excellent yield. The crude products were purified by column chromatography on silica gel using hexane/ethyl acetate.

## 5. NMR spectra of the materials and products

### <sup>1</sup>H NMR of bisacylthiourea B

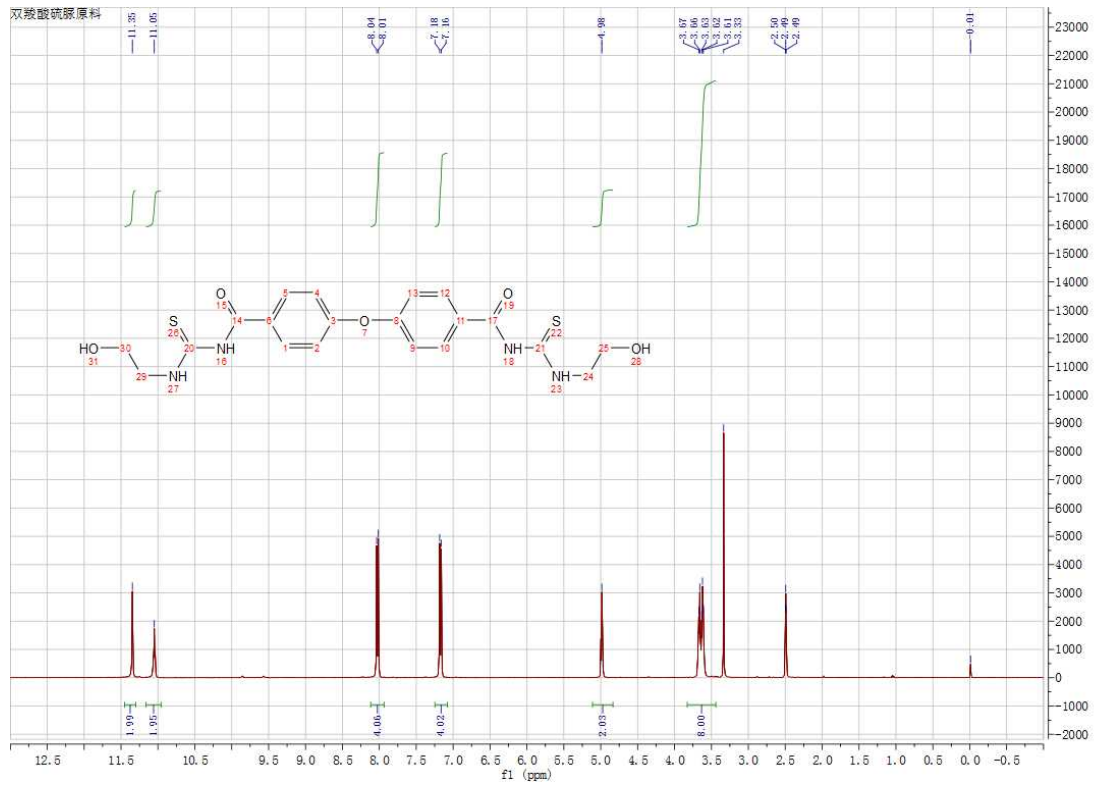

### <sup>13</sup>C NMR of bisacylthiourea B

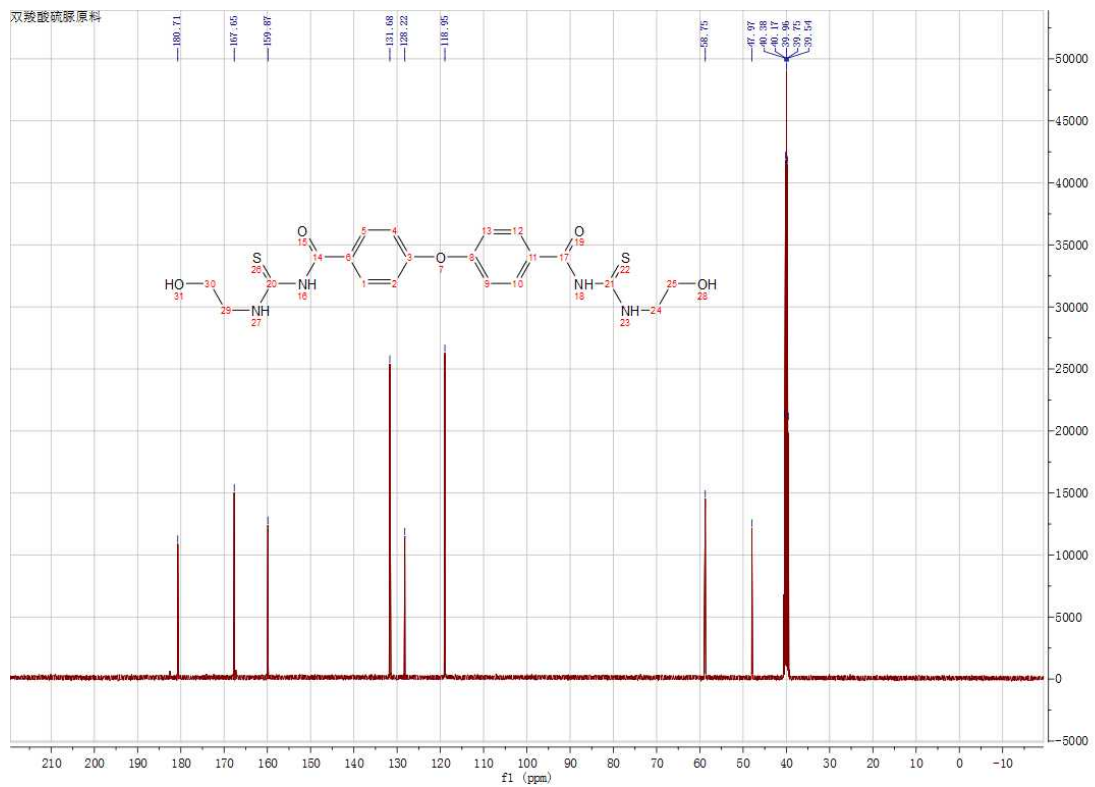

### <sup>1</sup>H NMR of bisoxazoline C

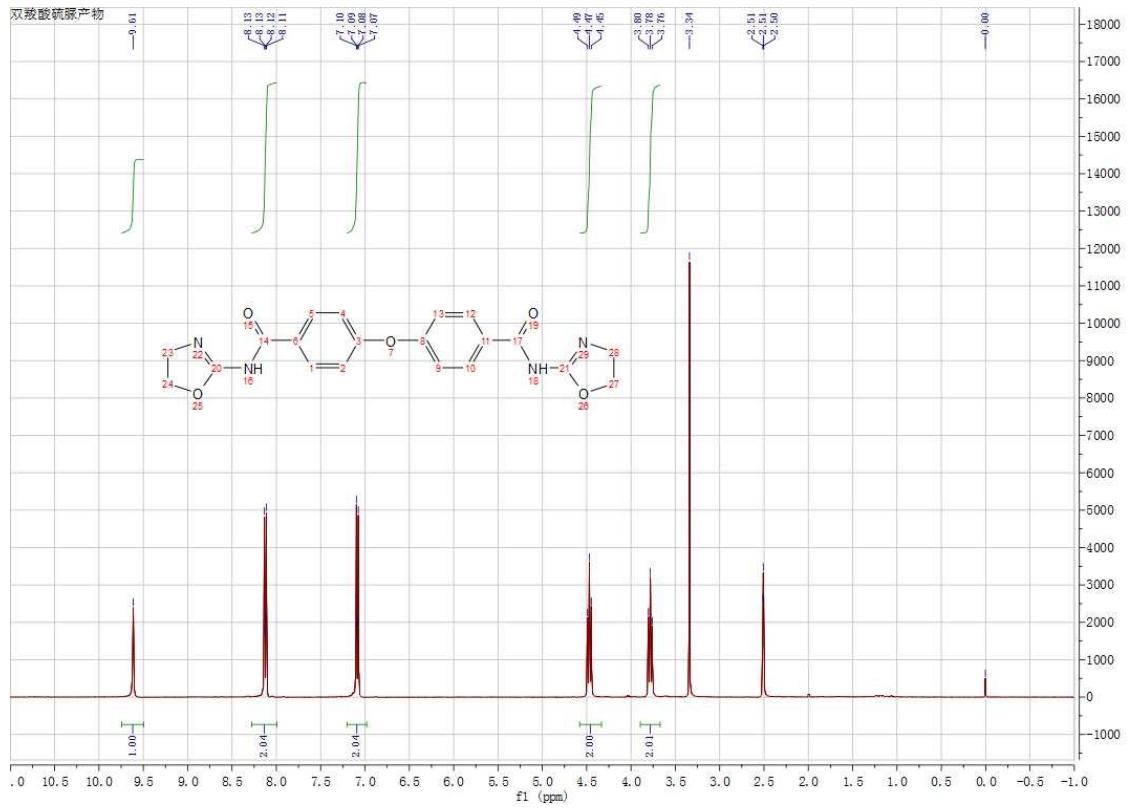

### <sup>13</sup>C NMR of bisoxazoline C

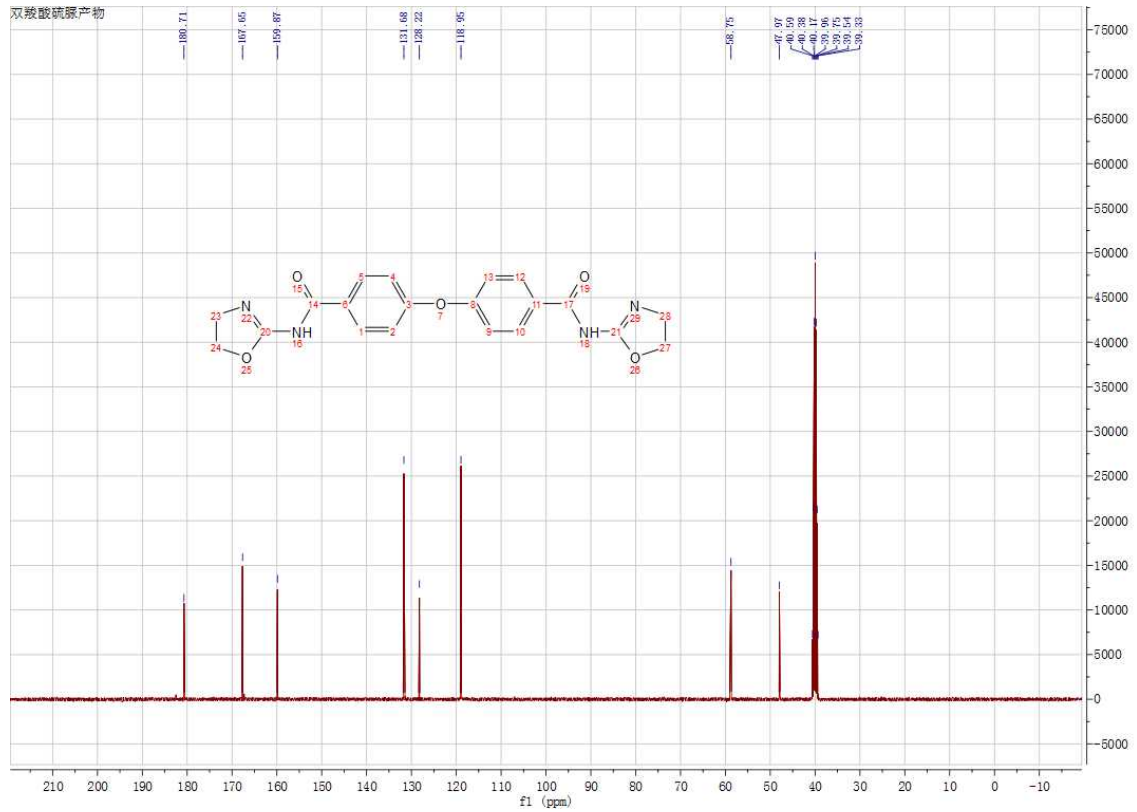

**Entry 1.**  $^1\text{H}$  NMR (400 MHz,  $\text{CDCl}_3$ )  $\delta$  7.95 (d,  $J = 8.4$  Hz, 2H), 7.66 – 7.50 (m, 4H), 7.38 (dd,  $J = 8.1, 6.8$  Hz, 2H), 7.30 (s, 1H), 7.18 (d,  $J = 24.2$  Hz, 2H), 2.61 (s, 3H).

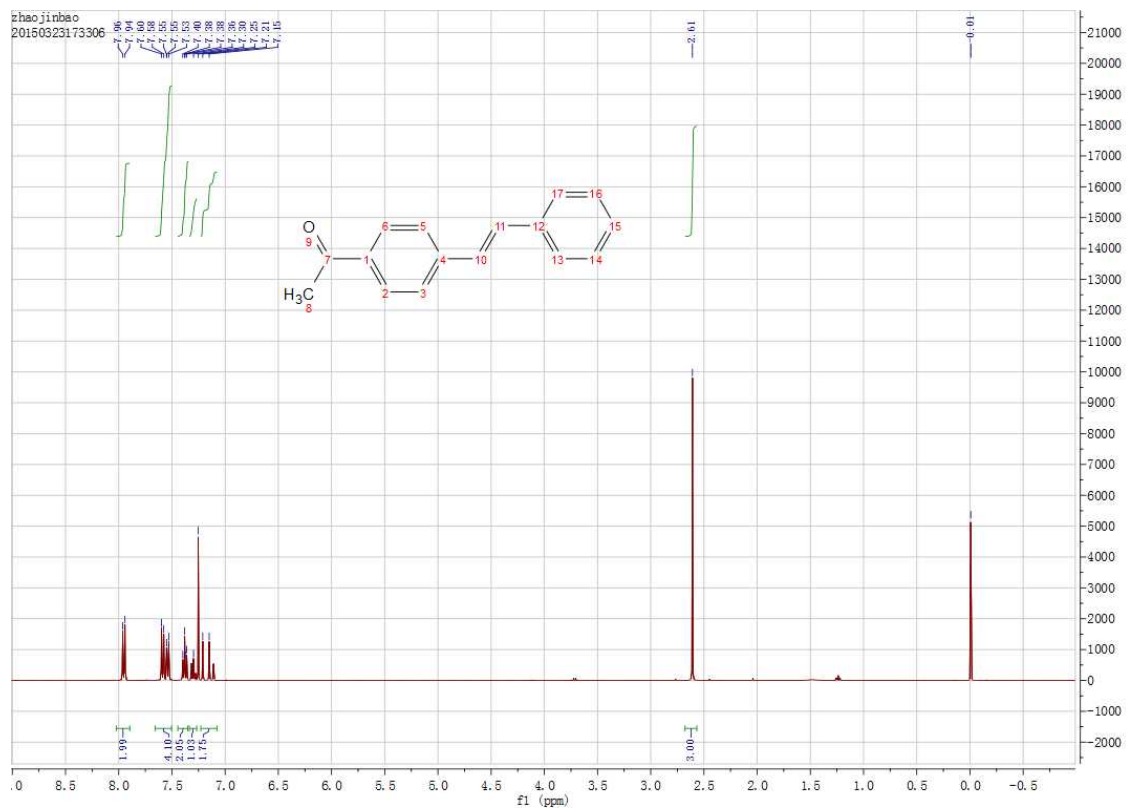

$^{13}\text{C}$  NMR (101 MHz,  $\text{CDCl}_3$ )  $\delta$  197.41, 142.03, 136.73, 136.01, 131.49, 128.83, 128.31, 127.48, 126.82, 126.50, 26.55.

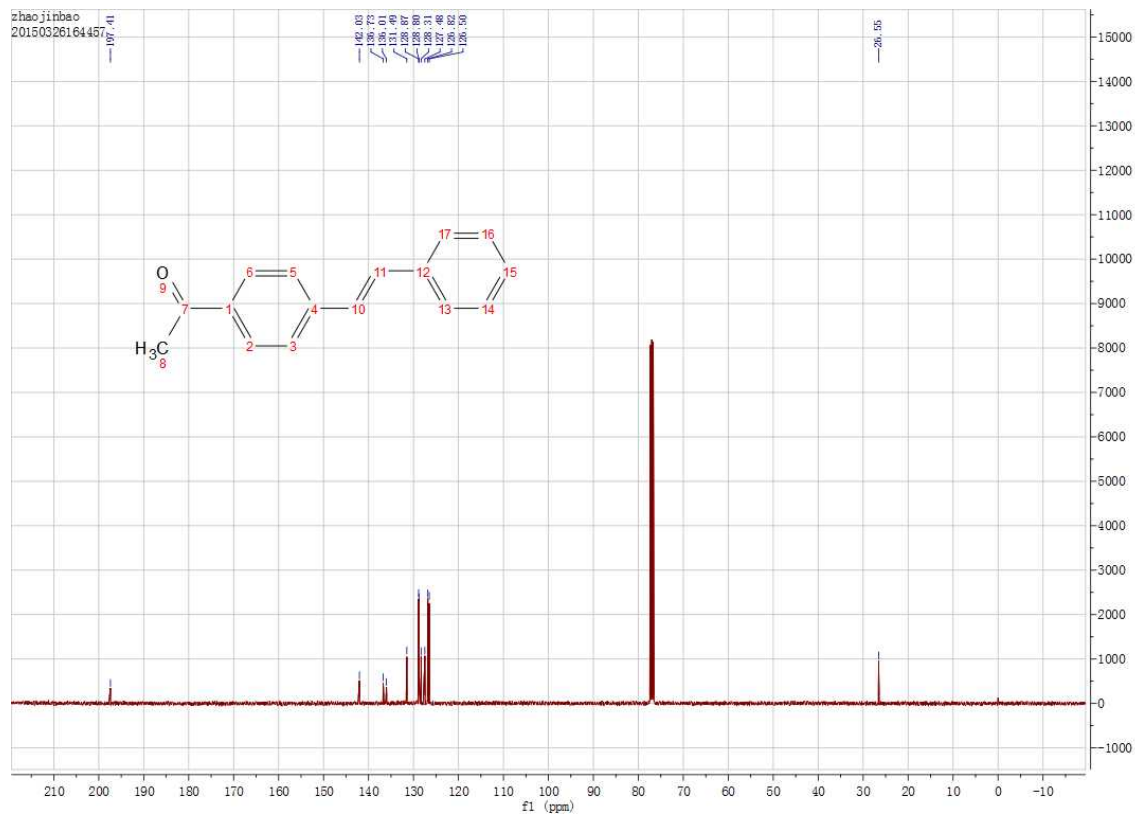

**Entry 2.**  $^1\text{H}$  NMR (400 MHz,  $\text{CDCl}_3$ )  $\delta$  7.98 (d,  $J = 8.3$  Hz, 2H), 7.72 (d,  $J = 16.1$  Hz, 1H), 7.61 (d,  $J = 8.2$  Hz, 2H), 6.53 (d,  $J = 16.1$  Hz, 1H), 3.83 (s, 3H), 2.62 (s, 3H).

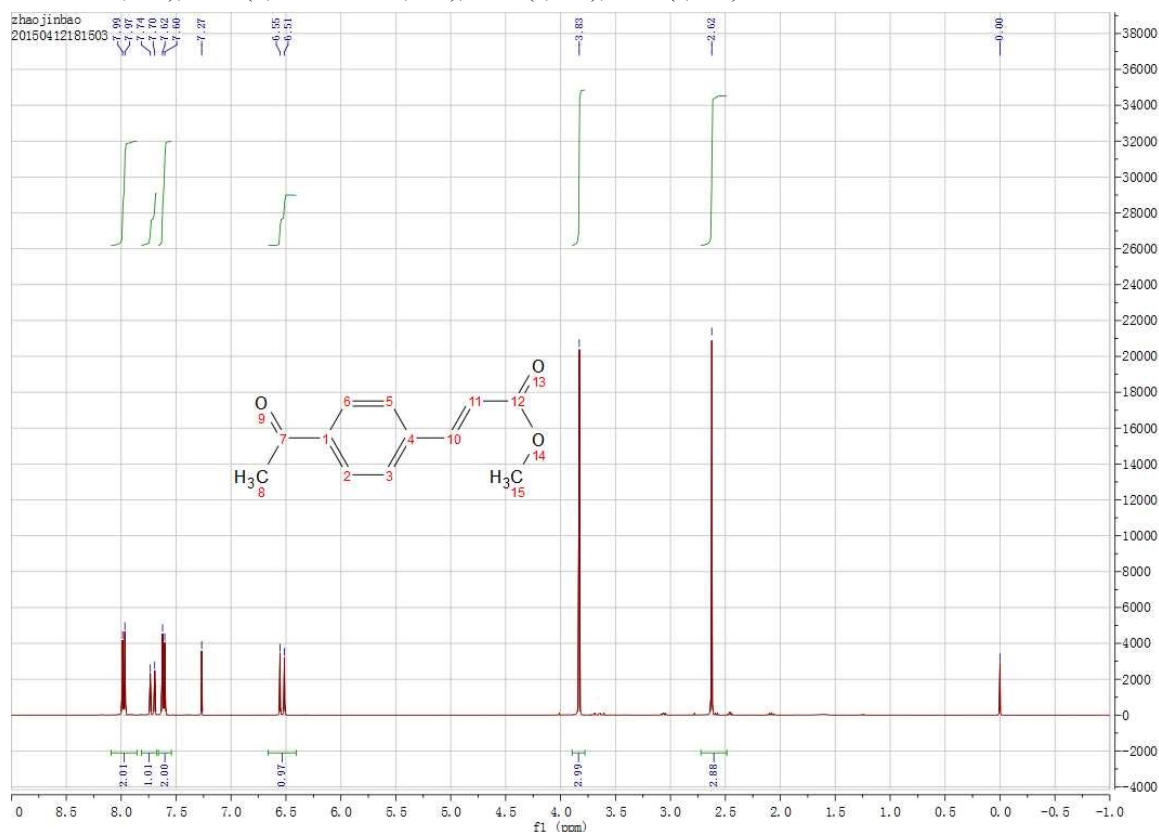

$^{13}\text{C}$  NMR (101 MHz,  $\text{CDCl}_3$ )  $\delta$  197.08 , 166.78 , 143.20 , 138.68 , 138.08 , 128.80 , 128.09 , 120.35 , 77.39 , 77.07 , 76.76 , 51.76 , 26.54 .

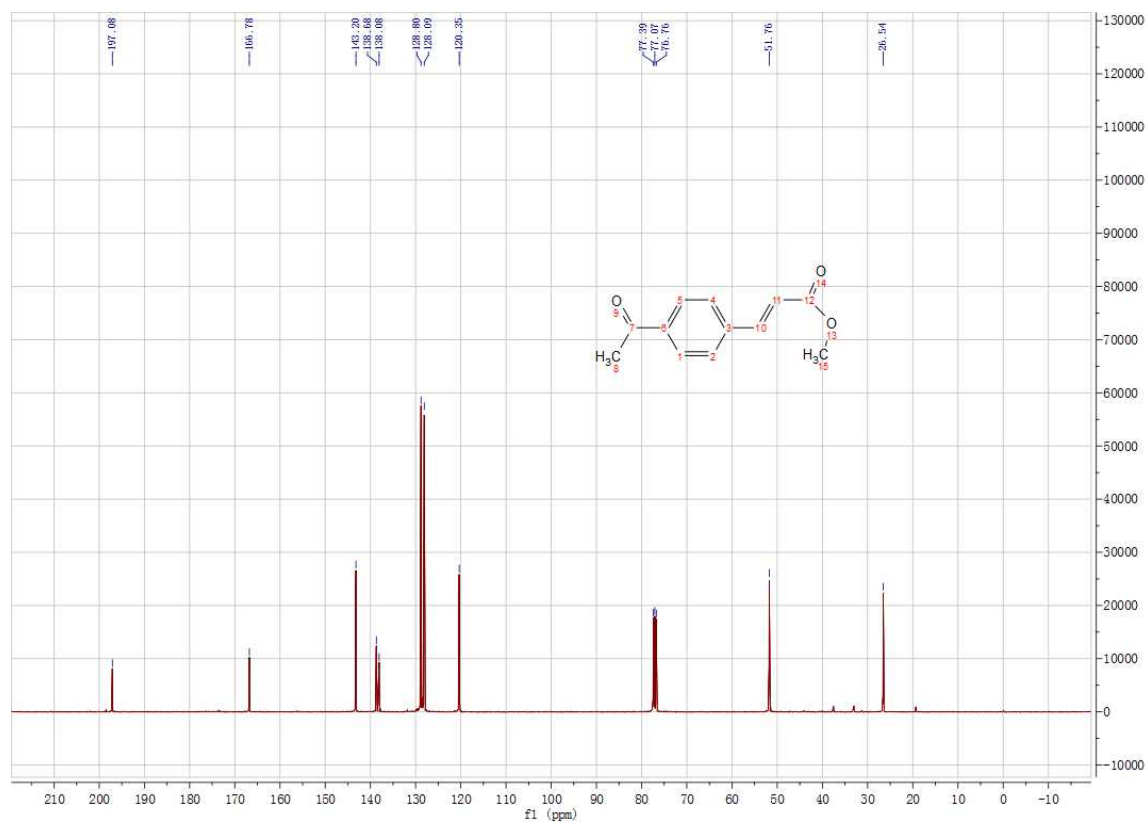

**Entry 3.**  $^1\text{H}$  NMR (400 MHz,  $\text{CDCl}_3$ )  $\delta$  7.96 (d,  $J = 8.3$  Hz, 2H), 7.68 – 7.51 (m, 3H), 6.46 (d,  $J = 16.1$  Hz, 1H), 2.62 (s, 3H), 1.54 (s, 9H).

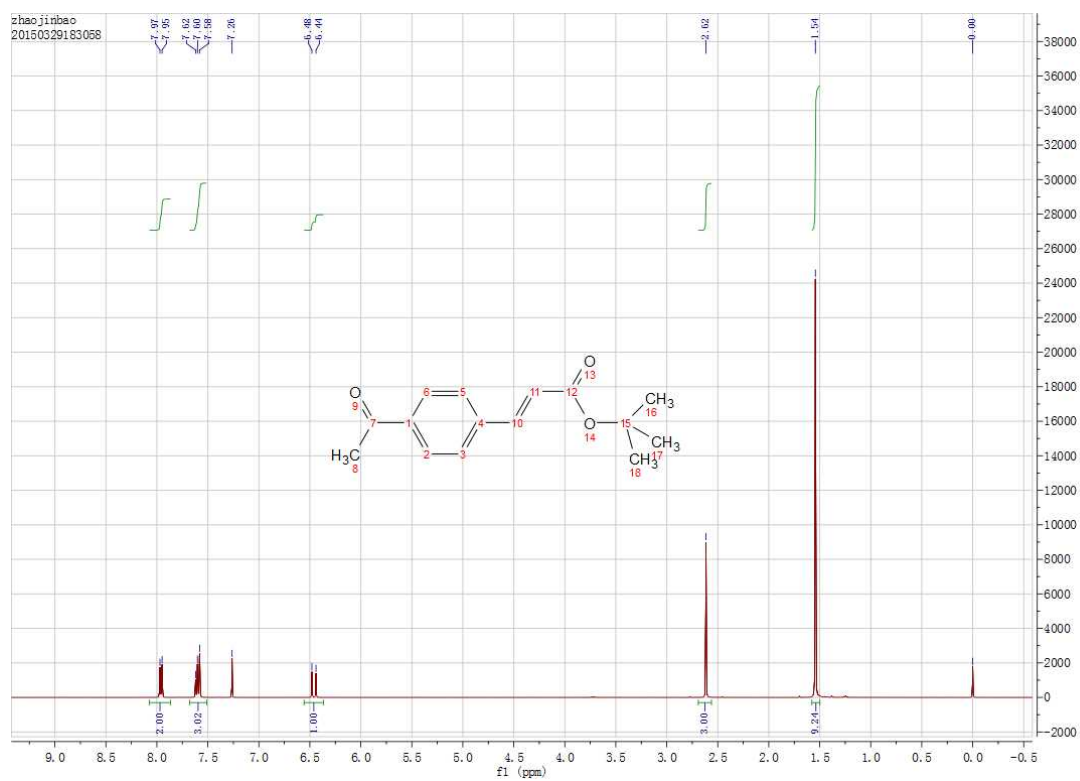

$^{13}\text{C}$  NMR (101 MHz,  $\text{CDCl}_3$ )  $\delta$  197.33 , 165.77 , 141.96 , 139.08 , 137.81 , 128.82 , 128.01 , 122.79 , 80.94 , 77.34 , 77.02 , 76.70 , 28.16 , 26.66 .



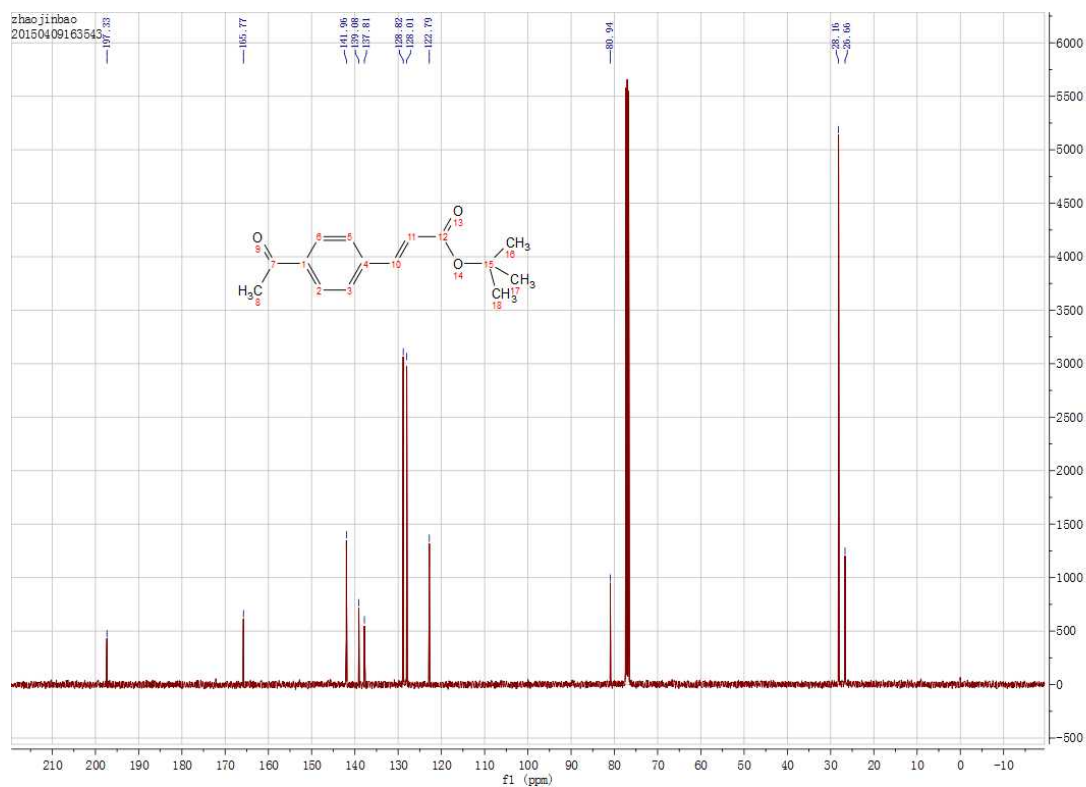

**Entry 4.**  $^1\text{H}$  NMR (400 MHz,  $\text{CDCl}_3$ )  $\delta$  10.04 (s, 1H), 7.98 – 7.82 (m, 2H), 7.70 (dd,  $J = 17.7, 12.2$  Hz, 3H), 6.56 (d,  $J = 16.0$  Hz, 1H), 3.84 (s, 3H).

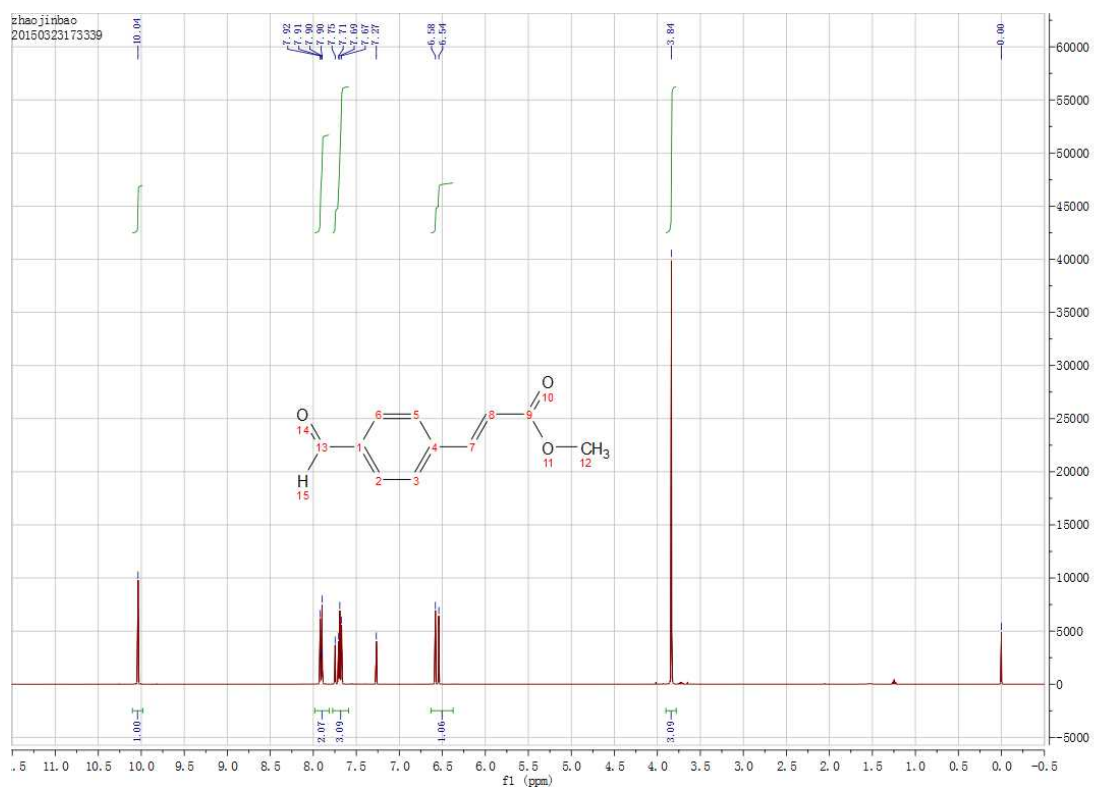

$^{13}\text{C}$  NMR (101 MHz,  $\text{CDCl}_3$ )  $\delta$  191.36, 166.78, 143.12, 140.09, 137.27, 130.18, 128.53, 121.05, 51.94.

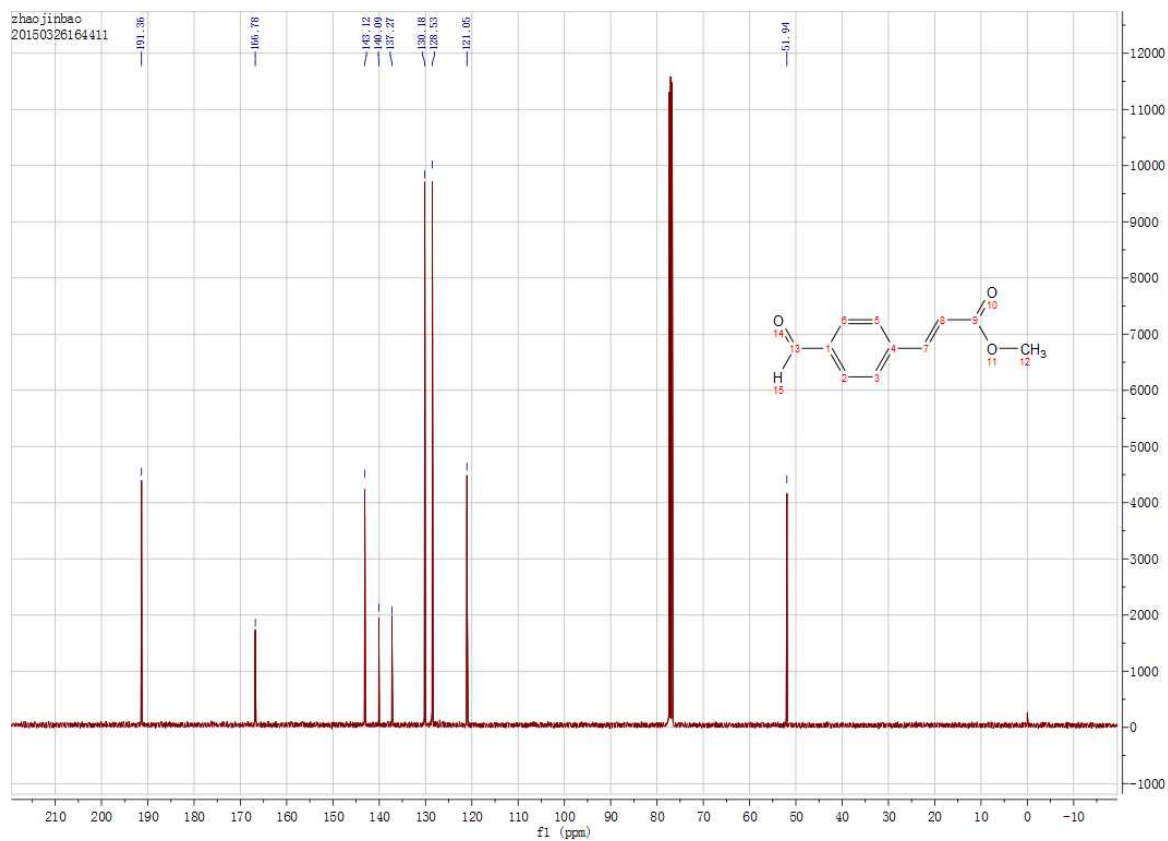

**Entry 5.**  $^1\text{H NMR}$  (400 MHz,  $\text{CDCl}_3$ )  $\delta$  10.03 (s, 1H), 7.96 – 7.82 (m, 2H), 7.64 (dd,  $J = 20.3, 12.2$  Hz, 3H), 6.49 (d,  $J = 16.0$  Hz, 1H), 1.55 (s, 9H).

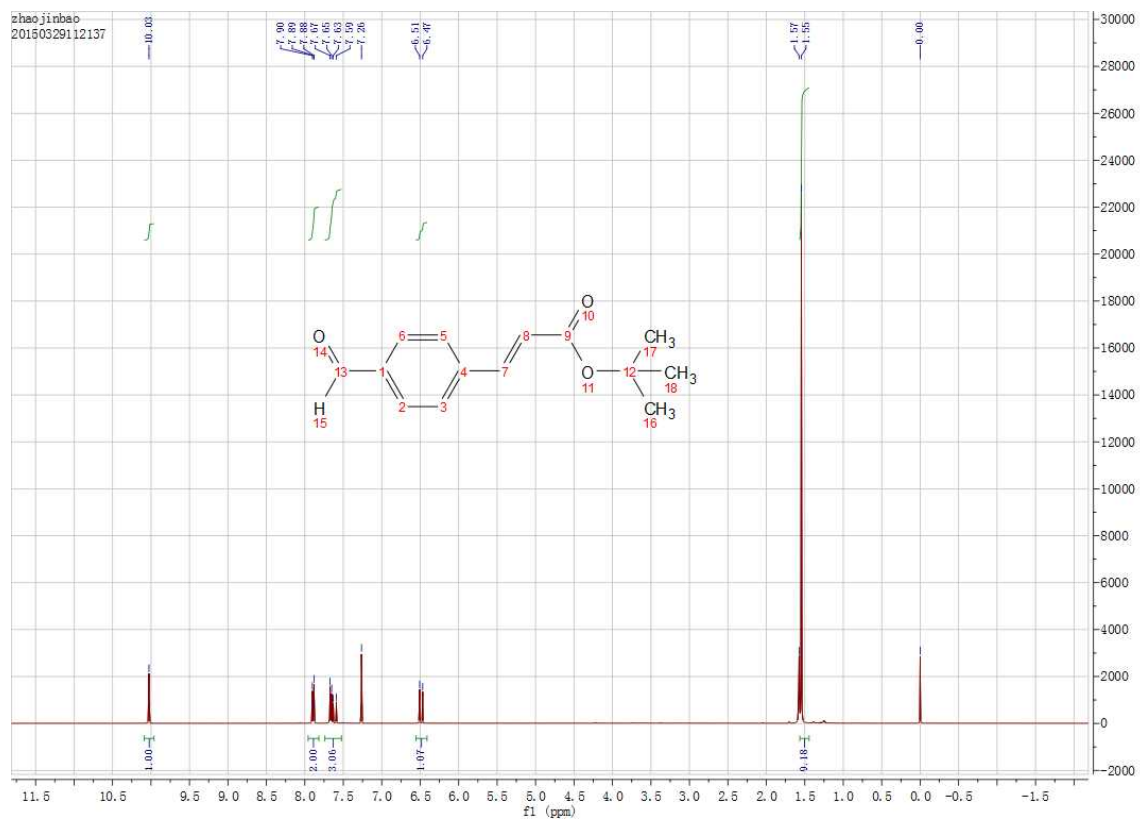

$^{13}\text{C}$  NMR (101 MHz,  $\text{CDCl}_3$ )  $\delta$  191.42 , 165.59 , 141.77 , 140.41 , 136.98 , 130.11 , 128.37 , 123.45 , 81.02 , 28.14 .

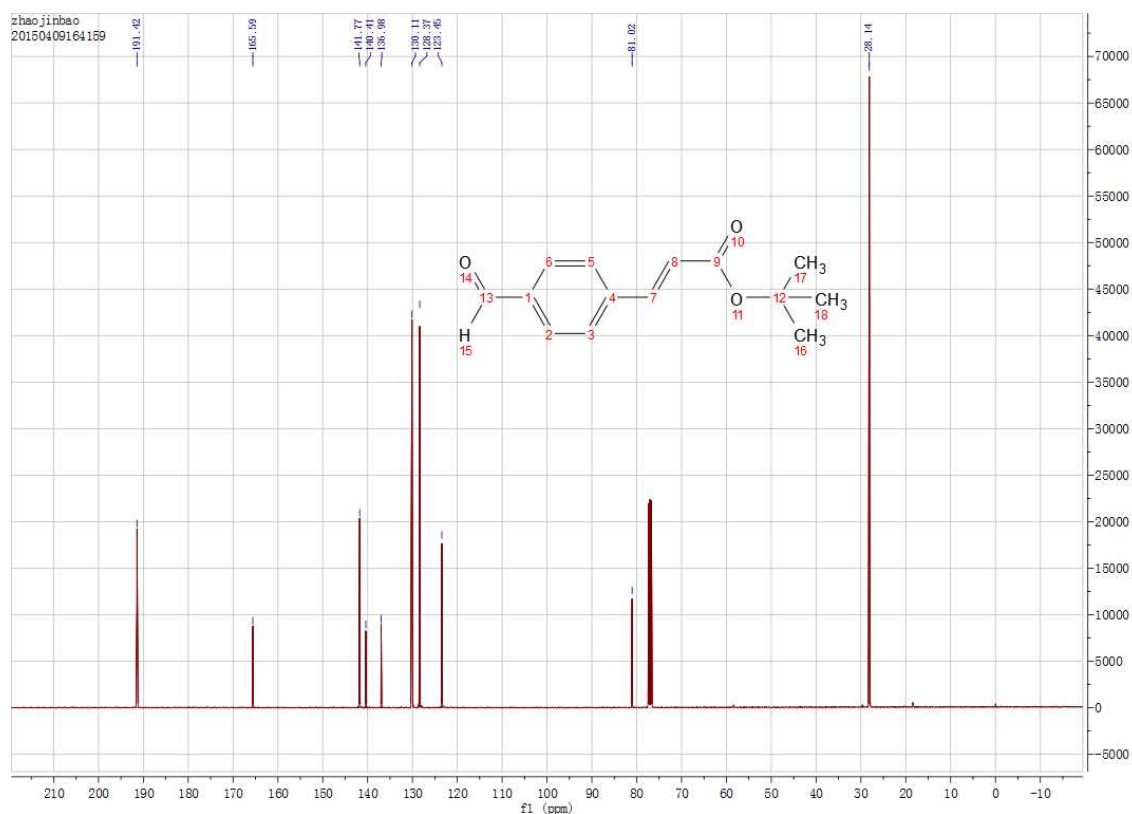

**Entry 6.**  $^1\text{H}$  NMR (400 MHz,  $\text{CDCl}_3$ )  $\delta$  10.04 (s, 1H), 7.91 (d,  $J = 8.3$  Hz, 2H), 7.70 (dd,  $J = 12.0$ , 10.0 Hz, 3H), 6.58 (d,  $J = 16.1$  Hz, 1H), 4.02 (d,  $J = 6.7$  Hz, 2H), 2.16 – 1.92 (m, 1H), 1.00 (d,  $J = 6.7$  Hz, 6H).

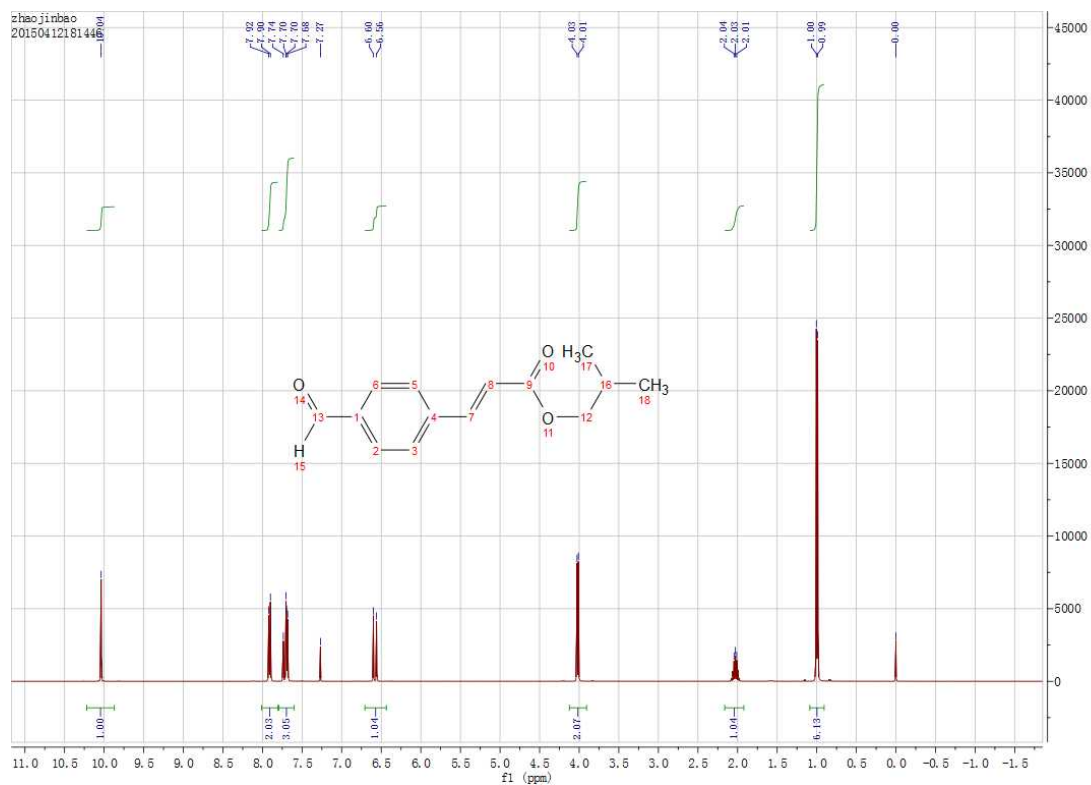

$^{13}\text{C}$  NMR (101 MHz,  $\text{CDCl}_3$ )  $\delta$  191.38 , 166.41 , 142.80 , 140.17 , 137.17 , 130.13 , 128.49 , 121.51 , 77.33 , 77.02 , 76.70 , 70.96 , 27.82 , 19.11 .

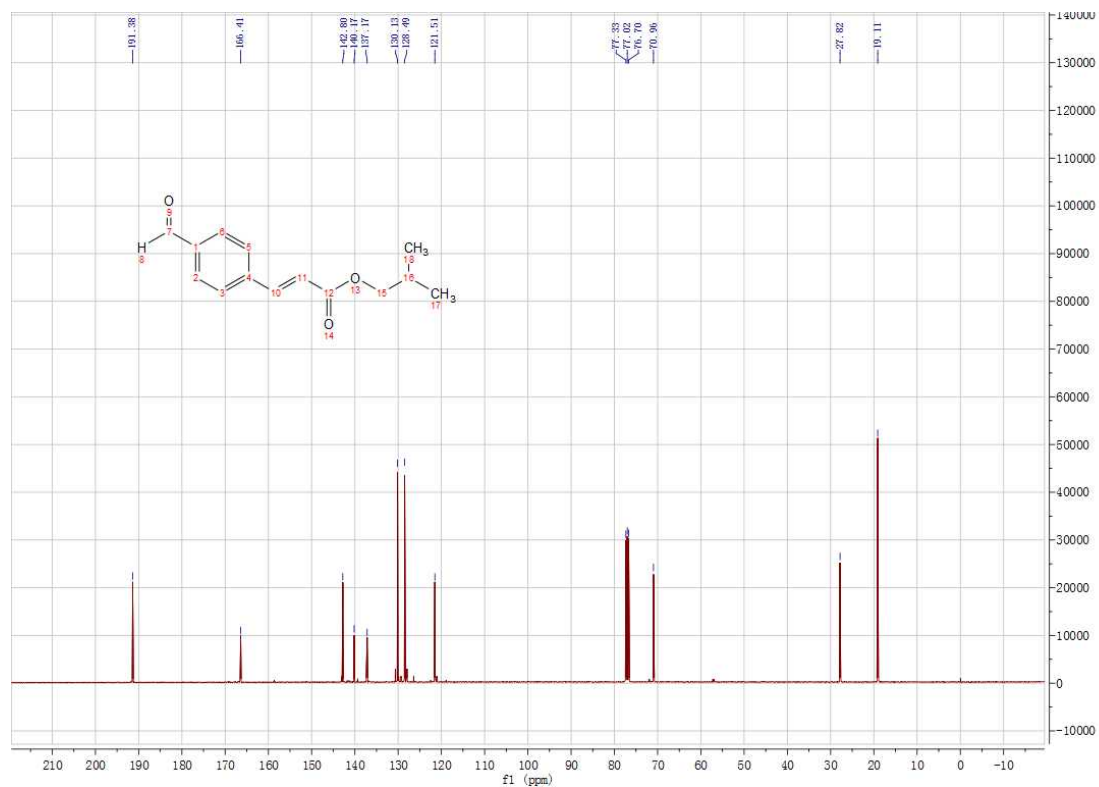

**Entry 7.**  $^1\text{H}$  NMR (400 MHz,  $\text{CDCl}_3$ )  $\delta$  7.70 (d,  $J$  = 16.0 Hz, 1H), 7.61 – 7.46 (m, 2H), 7.44 – 7.27 (m, 3H), 6.45 (d,  $J$  = 16.0 Hz, 1H), 3.81 (s, 3H).

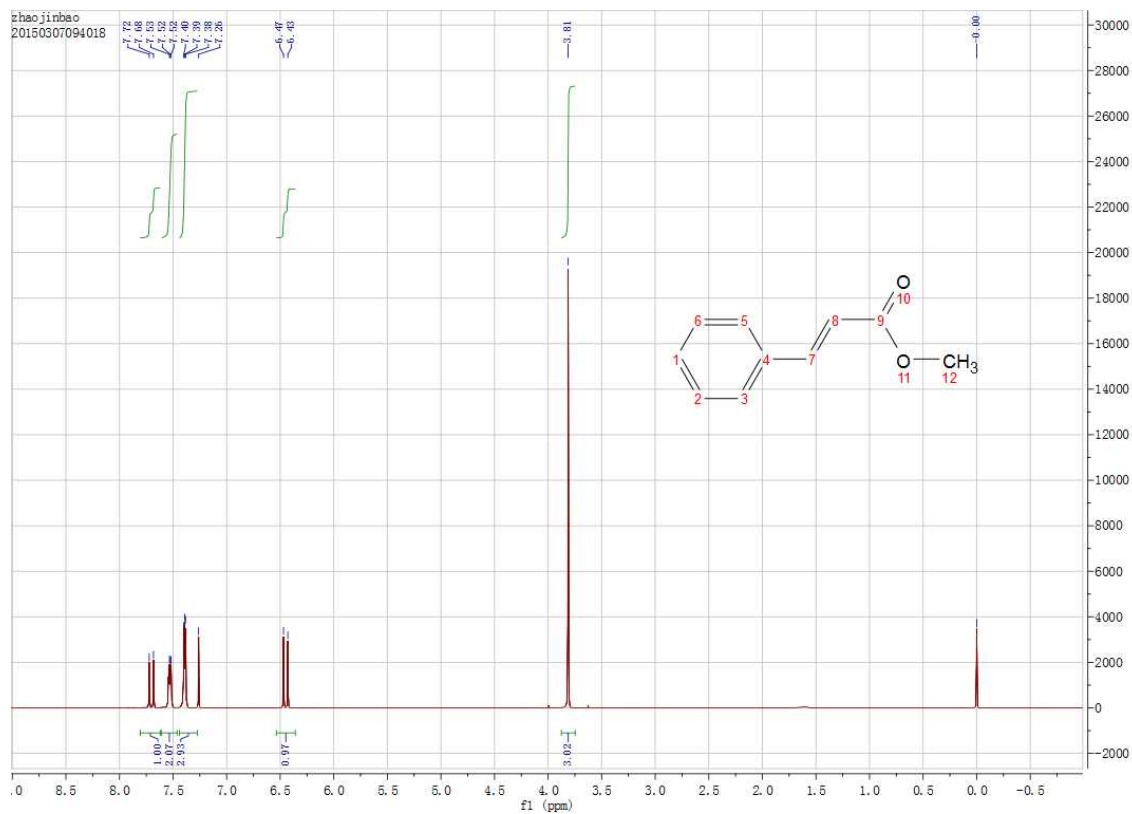

$^{13}\text{C}$  NMR (101 MHz,  $\text{CDCl}_3$ )  $\delta$  167.43 , 144.89 , 134.47 , 130.30 , 128.92 , 128.09 , 117.88 , 51.70 .

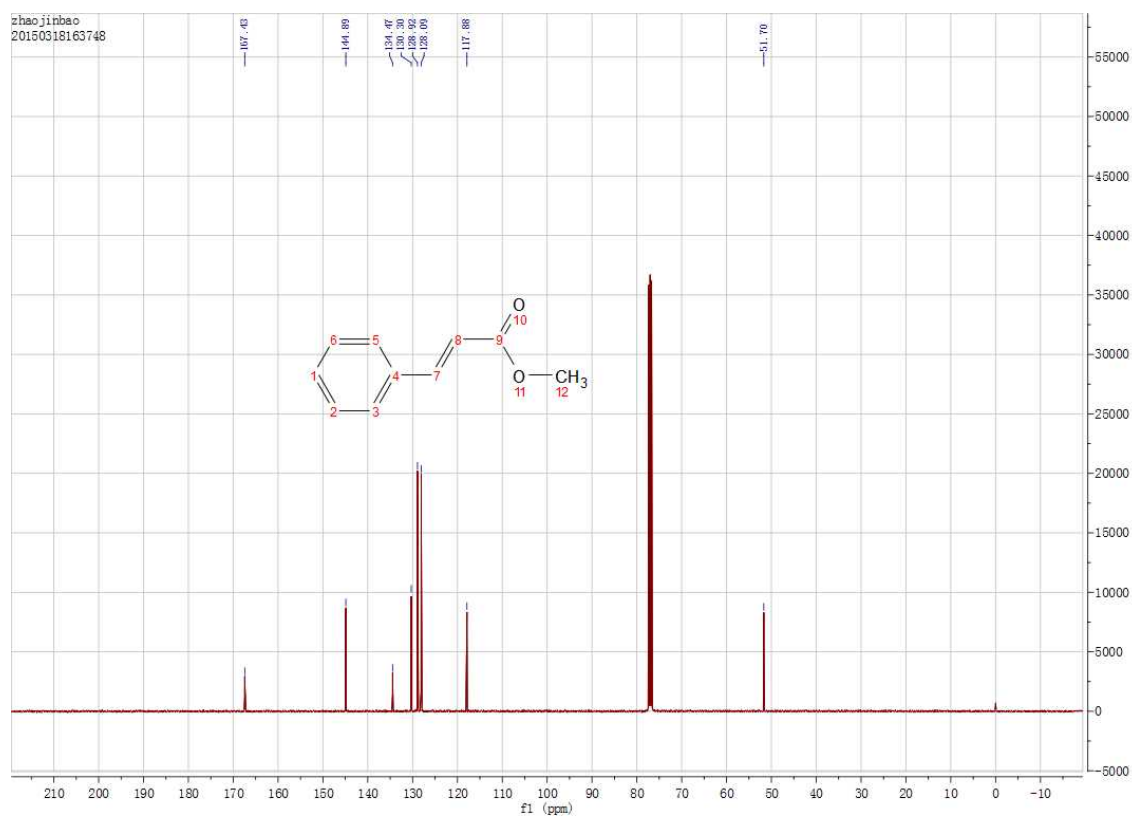

**Entry 8.**  $^1\text{H}$  NMR (400 MHz,  $\text{CDCl}_3$ )  $\delta$  7.59 (d,  $J = 16.0$  Hz, 1H), 7.51 (dd,  $J = 6.7, 3.3$  Hz, 2H), 7.40 – 7.31 (m, 3H), 6.37 (d,  $J = 16.0$  Hz, 1H), 1.54 (s, 9H).

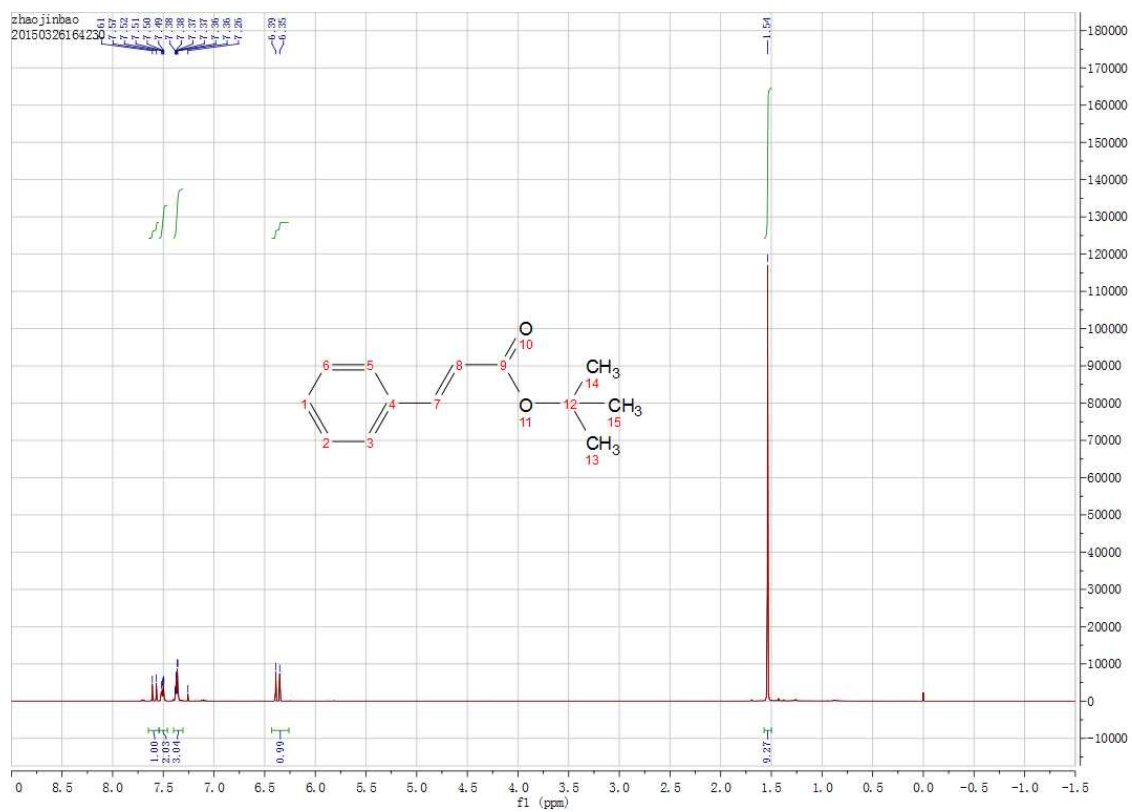

$^{13}\text{C}$  NMR (101 MHz,  $\text{CDCl}_3$ )  $\delta$  141.85 , 136.31 , 132.46 , 128.88 , 128.66 , 127.04, 126.55, 119.04 , 110.60 .

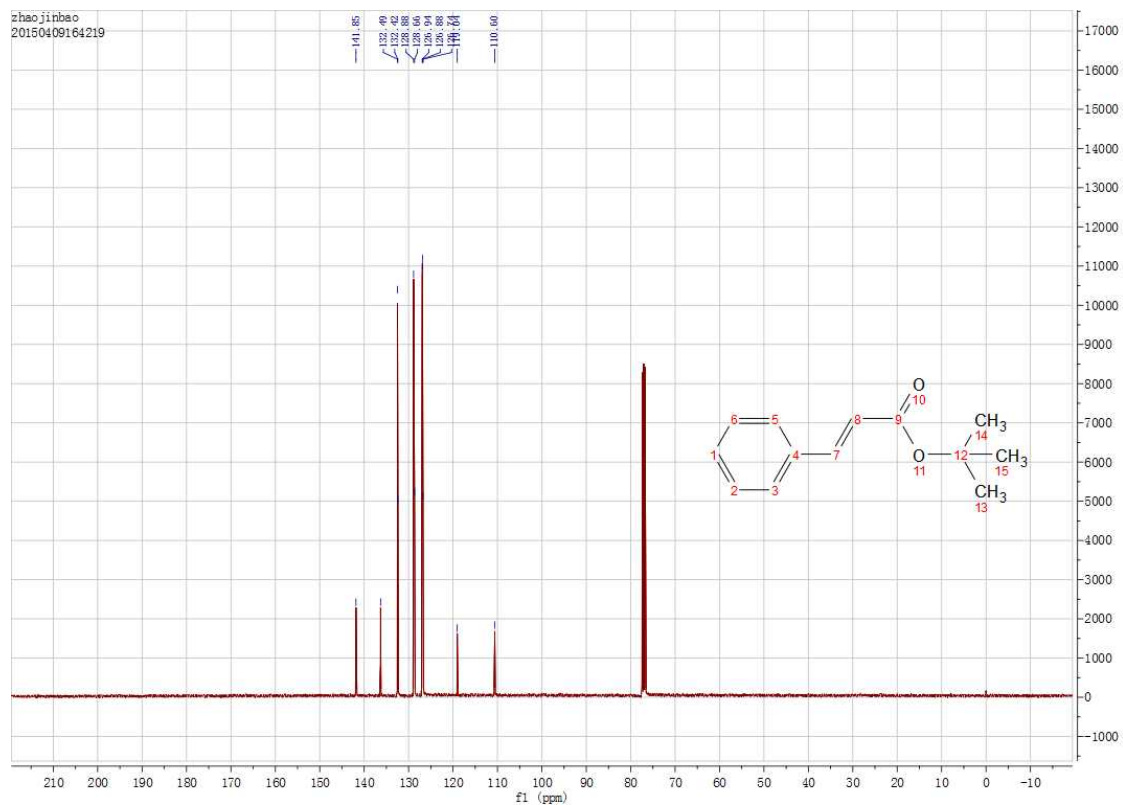

**Entry 9.**  $^1\text{H}$  NMR (400 MHz,  $\text{CDCl}_3$ )  $\delta$  7.69 – 7.50 (m, 6H), 7.32 (ddd,  $J = 48.4, 19.4, 11.8$  Hz, 4H), 7.09 (d,  $J = 16.3$  Hz, 1H).

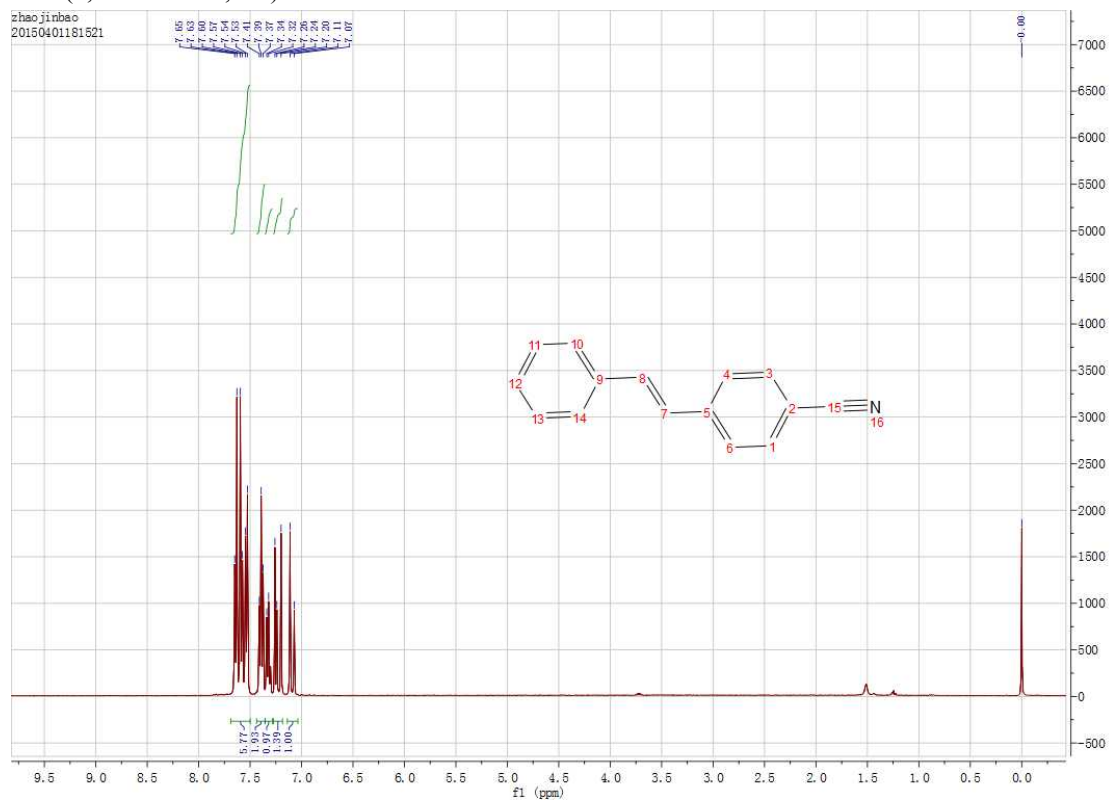

$^{13}\text{C}$  NMR (101 MHz,  $\text{CDCl}_3$ )  $\delta$  141.85, 136.31, 132.47 (d,  $J = 7.3$  Hz), 128.88, 128.67, 127.04, 126.60, 119.05, 110.60.

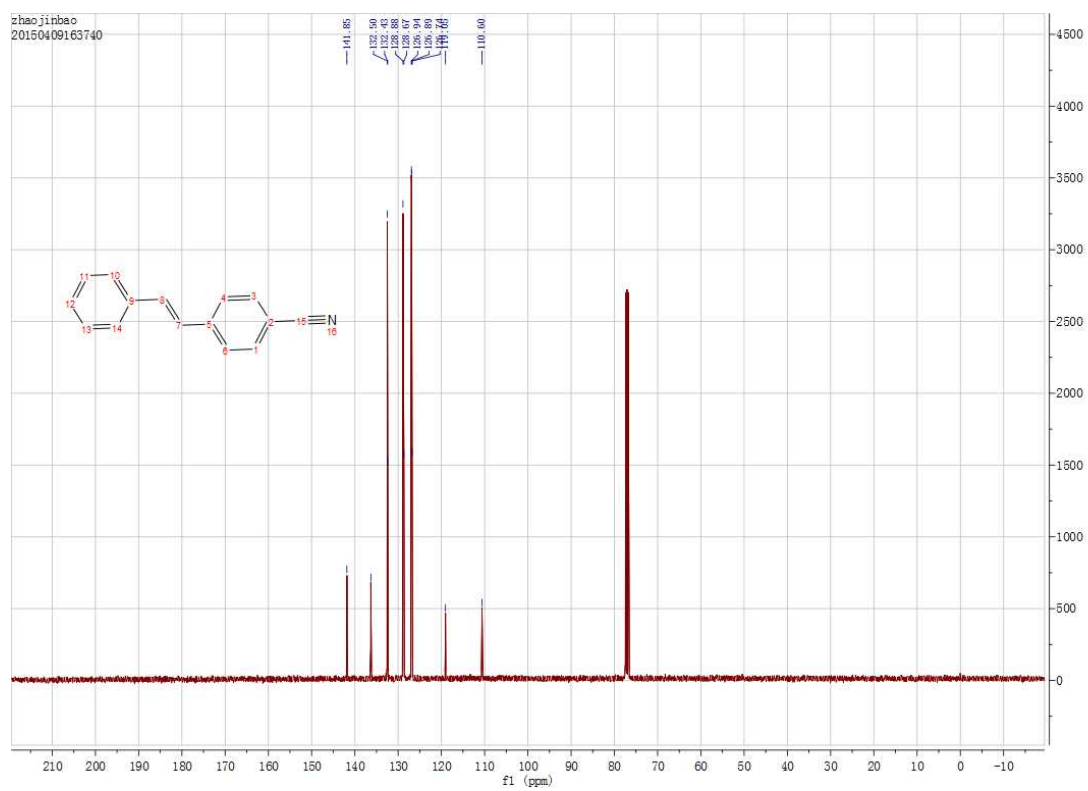

**Entry 10.**  $^1\text{H}$  NMR (400 MHz,  $\text{CDCl}_3$ )  $\delta$  7.68 (dd,  $J = 9.1, 7.3$  Hz, 3H), 7.61 (d,  $J = 8.3$  Hz, 2H), 6.52 (d,  $J = 16.0$  Hz, 1H), 3.83 (s, 3H).

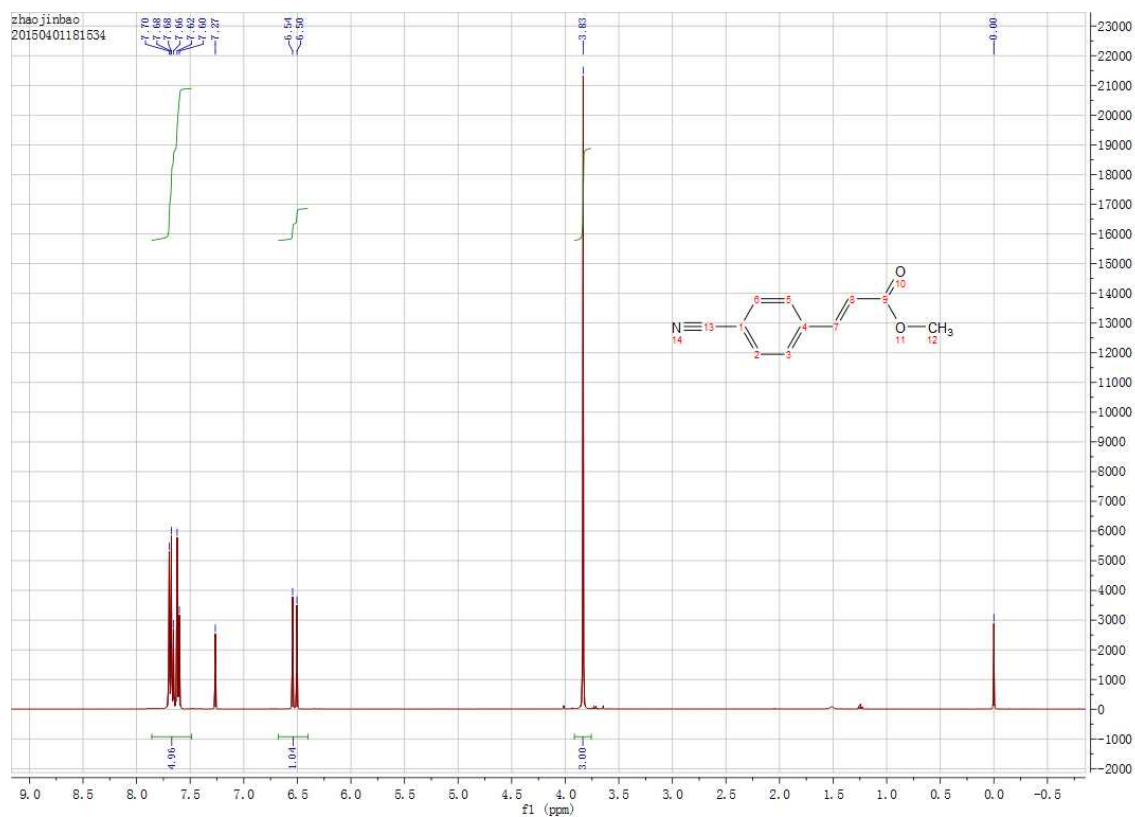

$^{13}\text{C}$  NMR (101 MHz,  $\text{CDCl}_3$ )  $\delta$  166.55 , 142.40 , 138.66 , 132.65 , 128.40 , 121.40 , 118.33 , 113.44 , 52.00 .

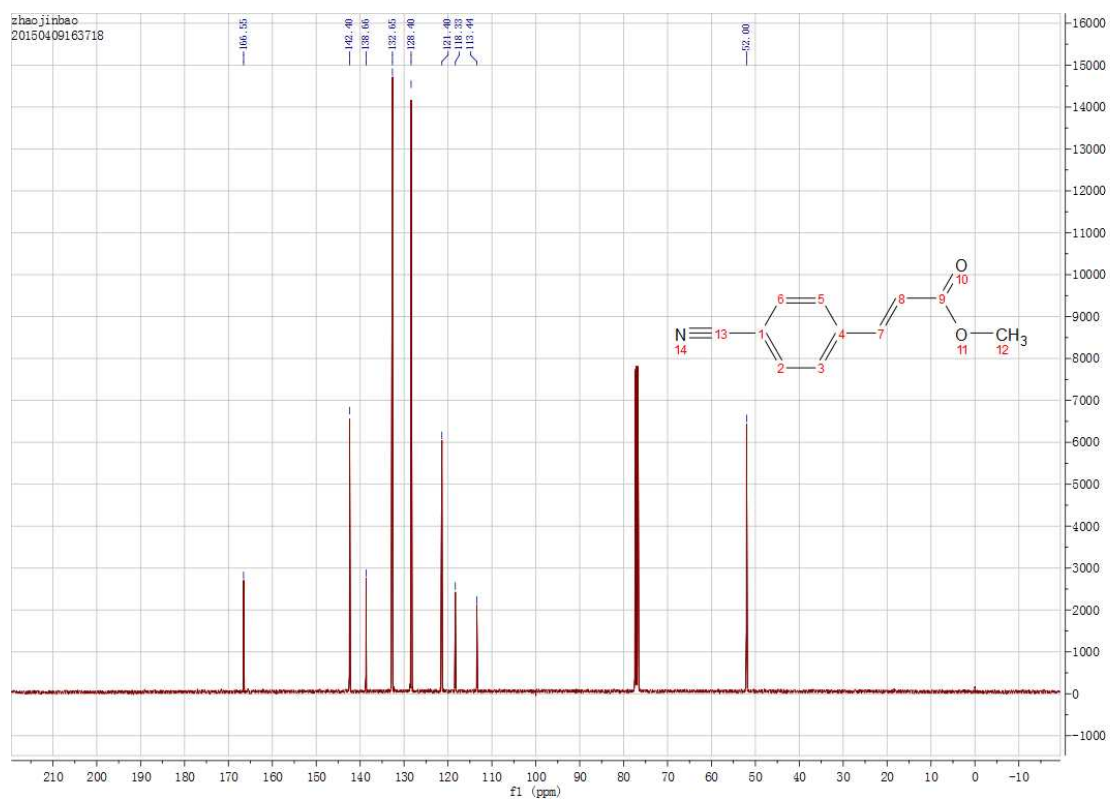

**Entry 11.**  $^1\text{H}$  NMR (400 MHz,  $\text{CDCl}_3$ )  $\delta$  7.71 – 7.64 (m, 2H), 7.63 – 7.50 (m, 3H), 6.45 (d,  $J$  = 16.0 Hz, 1H), 1.54 (s, 9H).



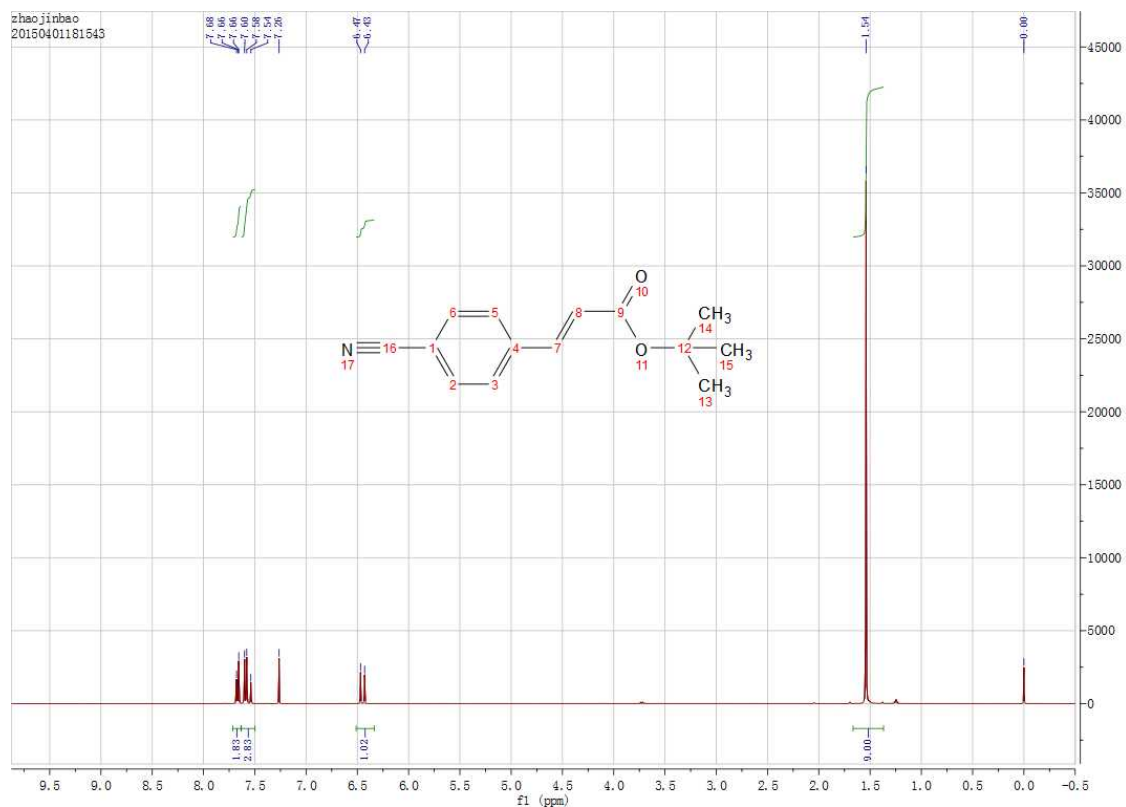

$^{13}\text{C NMR}$  (101 MHz,  $\text{CDCl}_3$ )  $\delta$  165.36, 141.08, 139.01, 132.58, 128.28, 123.82, 118.40, 113.09, 81.16, 77.41, 77.09, 76.77, 28.12.

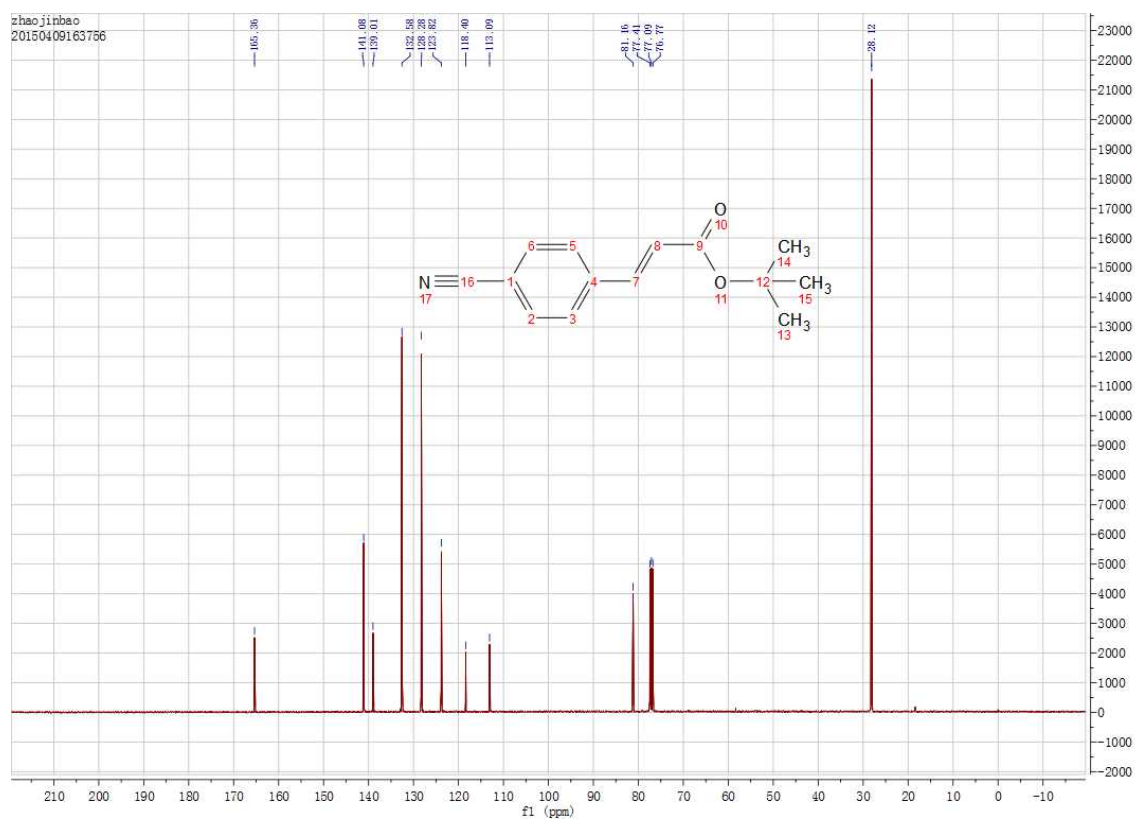

**Entry 12.**  $^1\text{H NMR}$  (400 MHz,  $\text{CDCl}_3$ )  $\delta$  7.68 (dd,  $J = 5.2, 3.2$  Hz, 2H), 7.63 (dd,  $J = 8.0, 6.2$  Hz, 2H), 6.54 (d,  $J = 16.0$  Hz, 1H), 4.01 (d,  $J = 6.7$  Hz, 2H), 2.02 (s, 1H), 0.99 (d,  $J = 6.7$  Hz, 6H).

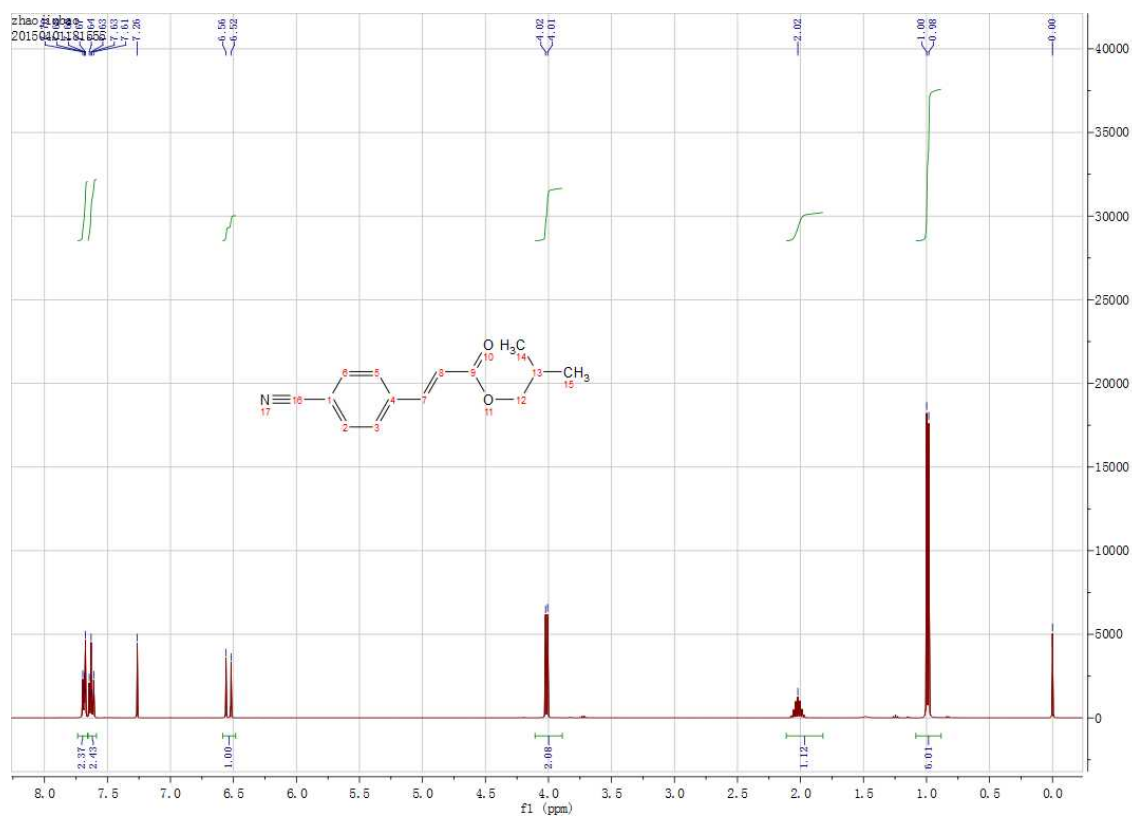

$^{13}\text{C NMR}$  (101 MHz,  $\text{CDCl}_3$ )  $\delta$  166.17, 142.09, 138.77, 132.62, 128.39, 121.89, 118.34, 113.35, 71.01, 27.80, 19.10.

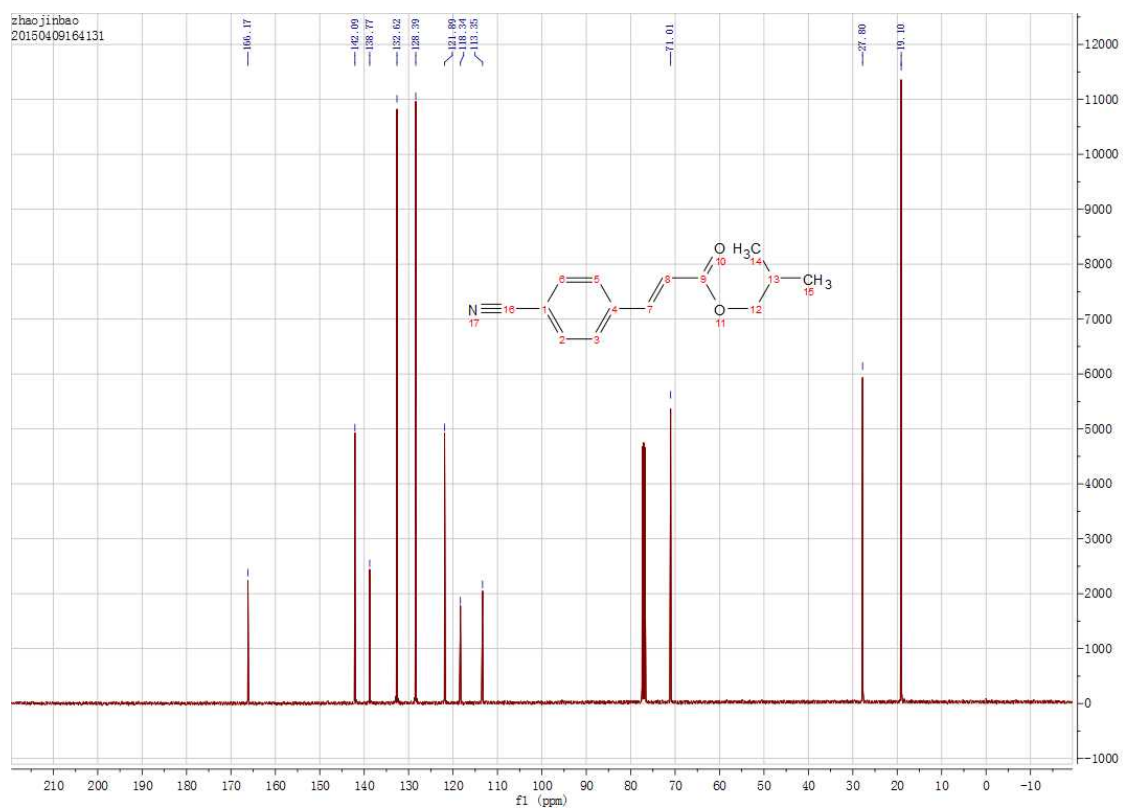

**Entry 13.**  $^1\text{H NMR}$  (400 MHz,  $\text{CDCl}_3$ )  $\delta$  7.55 – 7.49 (m, 4H), 7.42 – 7.32 (m, 4H), 7.29 – 7.24 (m, 2H), 7.12 (s, 2H).

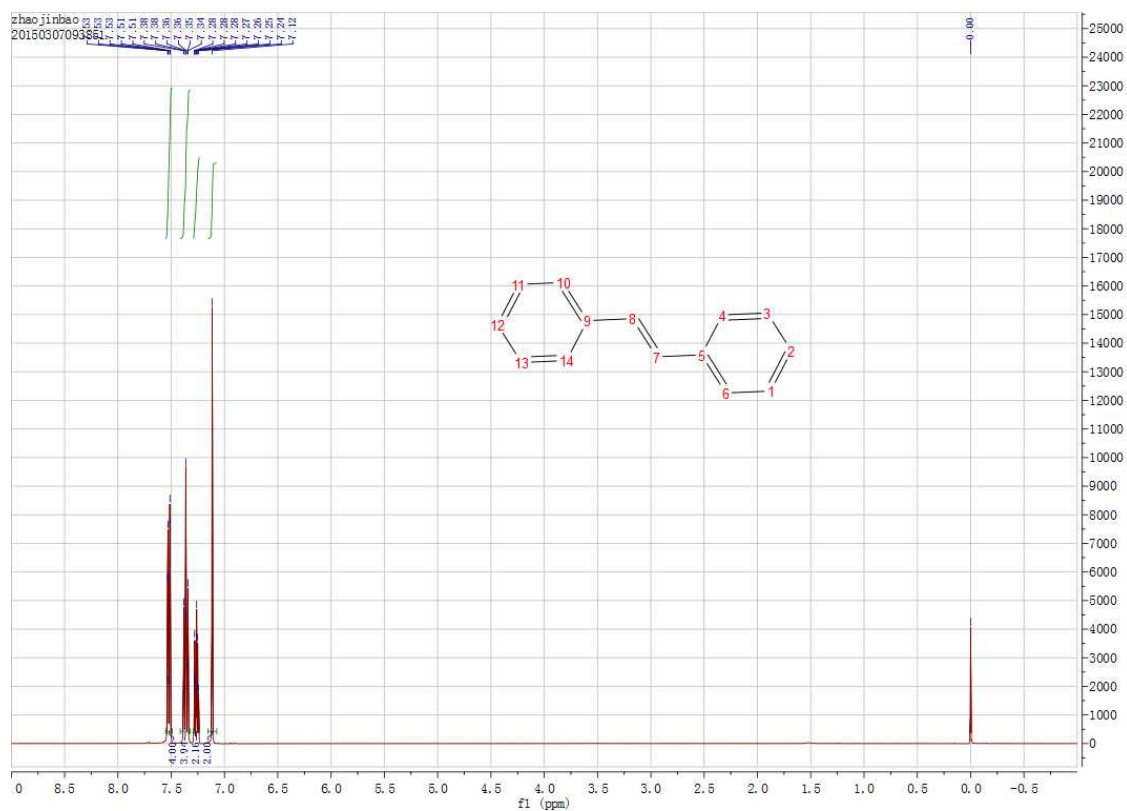

$^{13}\text{C}$  NMR (101 MHz,  $\text{CDCl}_3$ )  $\delta$  137.37, 128.71 (d,  $J = 5.4$  Hz), 127.62, 126.53, 77.34, 77.02, 76.70.

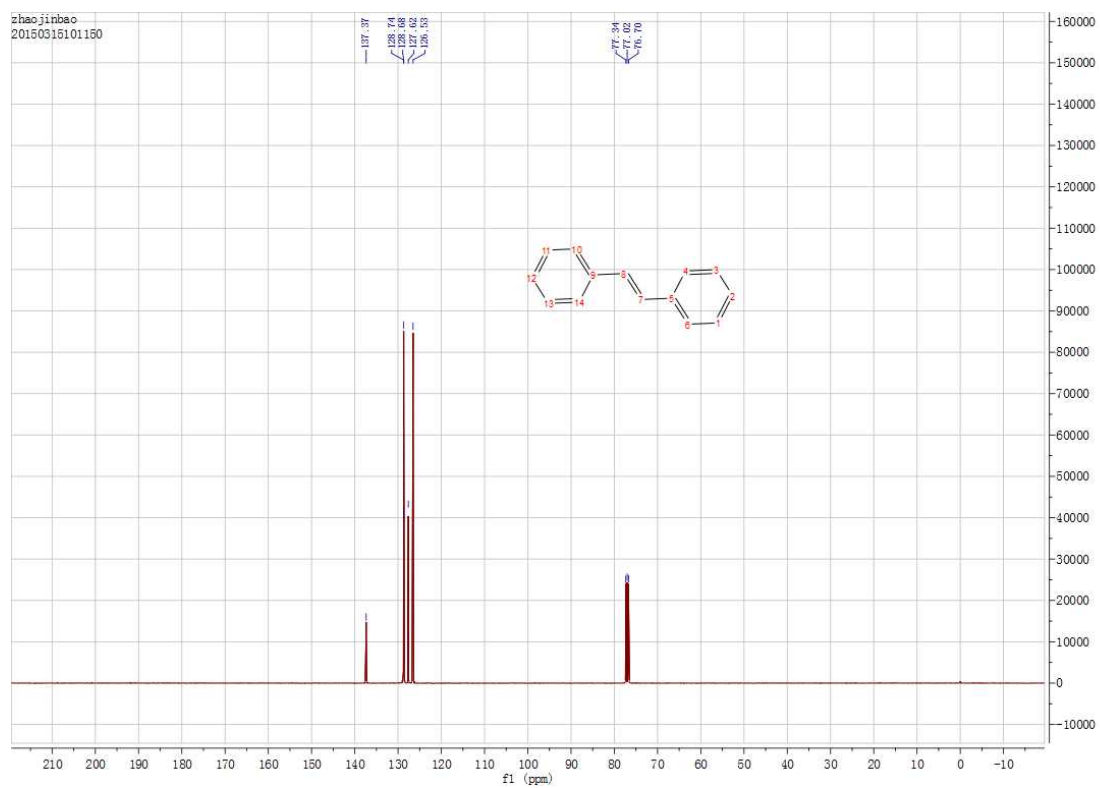

**Entry 14.**  $^1\text{H}$  NMR (400 MHz,  $\text{CDCl}_3$ )  $\delta$  7.48 (dd,  $J = 13.7, 8.2$  Hz, 4H), 7.35 (t,  $J = 7.6$  Hz, 2H), 7.24 (d,  $J = 7.3$  Hz, 1H), 7.12 – 6.85 (m, 4H), 3.83 (s, 3H).

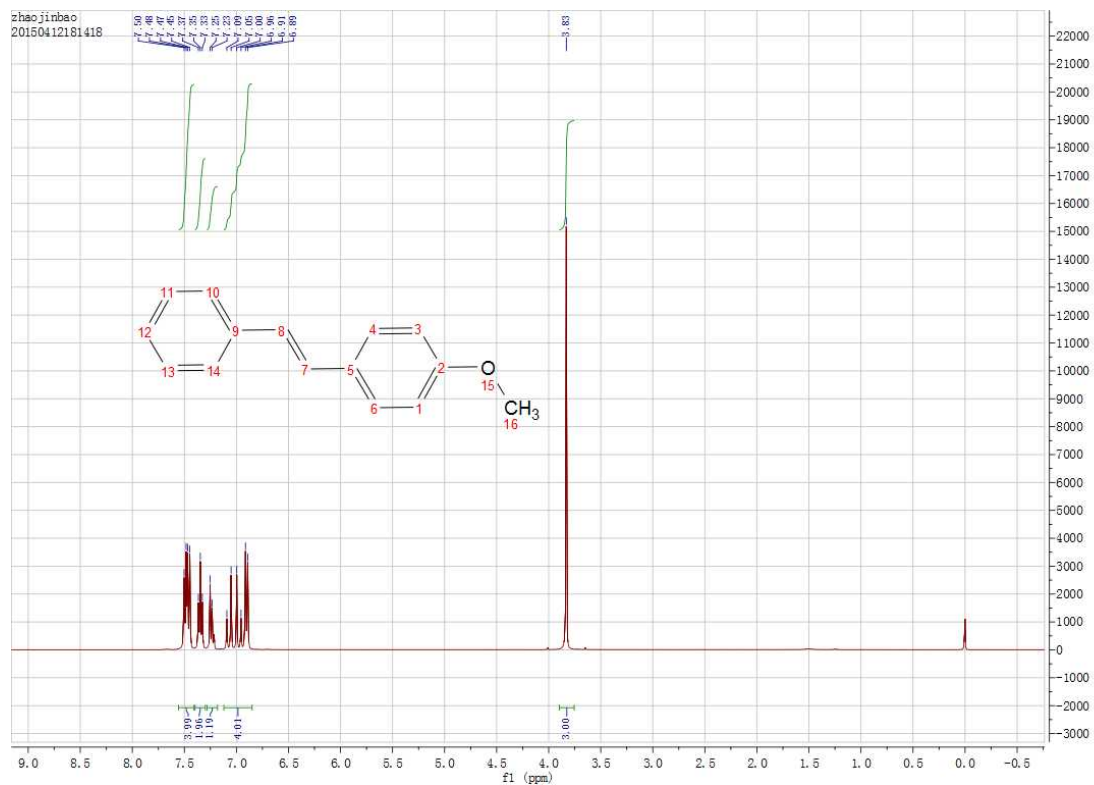

$^{13}\text{C}$  NMR (101 MHz,  $\text{CDCl}_3$ )  $\delta$  159.37 , 137.71 , 130.21 , 128.66 , 128.27 , 127.75 , 127.23 , 126.68 , 126.29 , 114.19 , 55.33 .

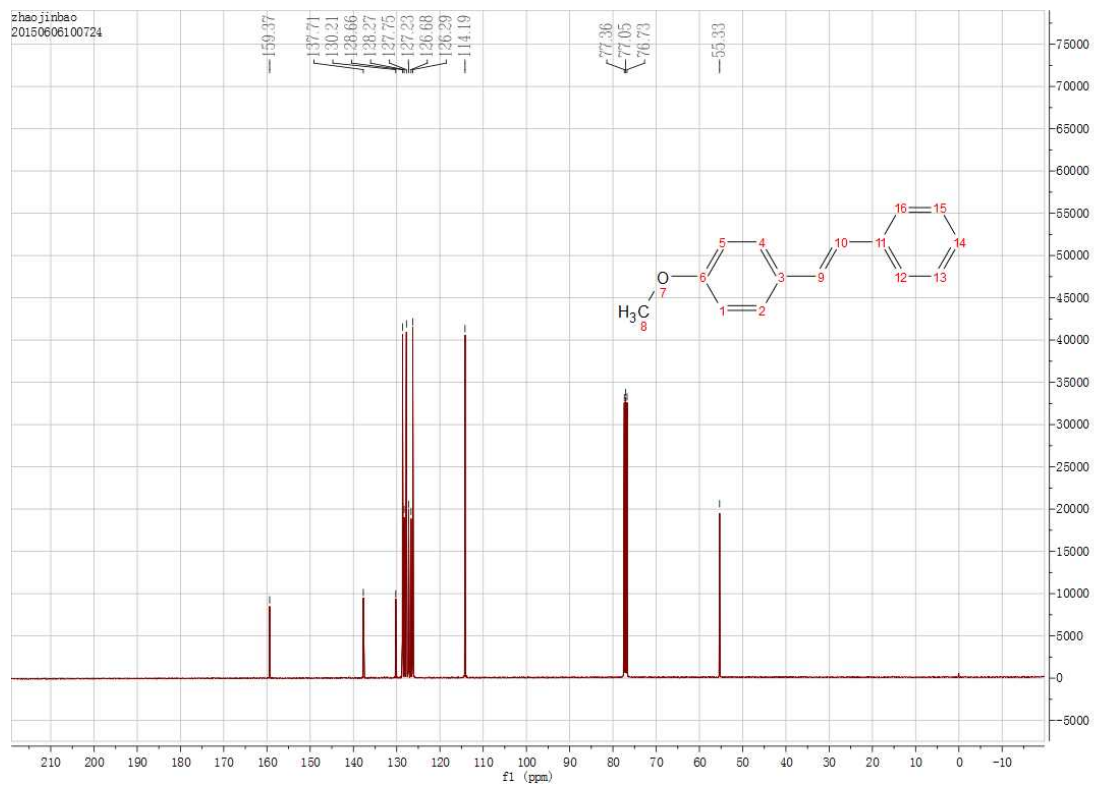

Supplement: c5ra16510e1.pdf [file c5ra16510e1.pdf]
